# Supplementary material for: A Complex Genome-MicroRNA Interplay in Human Mitochondria
Source: Biomed Res Int. 2015 Jan 28;2015:206382. doi: 10.1155/2015/206382 (PMC4324738; doi:10.1155/2015/206382)
Supplement: Supplementary file 1 — Table S1 has the information of Physico-Chemical Properties of 6 pre and mature miRNAs. Each column contains information such as %GC Content, %AU Content, Length, mol wt and Free energy of miRNAs. Table S2 has the list of predicted Human pre-microRNA and their genomic locations on mitochondrial genome. First Column Human miRNA has list of miRNA, second and third column has Start and end position of miRNAs, last fourth column has the pre-miRNA Sequences. Table S3 has the list of predicted Human mature-miRNA and their genomic location on mitochondrial genome. First column Human miRNA has list of miRNA, second and third column has start and end position of miRNAs and last fourth column has the mature miRNA sequences. Table S4 has the information of miRNA targets for miRanda analysis. First column has numbers, second has information of miRNAs targeting disease specific genes, third column has the location of genes which are targeted by miRNAs, fourth column has list of miRNAs and fifth and sixth column has start and end position of miRNAs. Table number S5 has miRNA targets for miRanda and RNA22 analysis. First column has serial numbers, second column contains information of miRNA targeting disease specific genes, third has the location of genes which are targeted by miRNAs, fourth column has list of miRNAs and fifth and sixth column has start and end position of miRNAs. Table number S6 has information of mitochondrial gene position and description. Column number one has serial numbers, second column has map locus, third has map position (np), fourth has shorthand of genes and last fifth column has description of genes. [file 206382.f1.xlsx]

## Sheet: Table S1
Table S1. Calculation of Physico-Chemical Properties
Mature miRNA	%GC Content	%AU Content	Length	mol wt	Free energy
hsa-miR-mit-1	43	57	21	6418.1	24
hsa-miR-mit-2	42	58	19	5809.7	21.7
hsa-miR-mit-3	45	55	22	6724.3	28.1
hsa-miR-mit-4	45	55	20	6115.8	25
hsa-miR-mit-5	36	64	22	6755.3	25.2
hsa-miR-mit-6	38	62	21	6488.2	24
Pre-miRNA	%GC Content	%AU Content	Length	mol wt	Free energy
hsa-miR-mit-1	38	62	121	39099.3	169.1
hsa-miR-mit-2	38	62	121	39257.1	173.3
hsa-miR-mit-3	43	57	120	39083.3	175.5
hsa-miR-mit-4	36	64	121	39295.2	166.8
hsa-miR-mit-5	37	63	121	39408.5	166.8
hsa-miR-mit-6	42	62	121	39092.1	177

## Sheet: Table S2
Table S2. List of predicted Human pre-microRNA and their genomic location on mitochondrial genome
Human miRNA	Start Position	End Position	Pre-miRNA Sequence
hsa-mir-mit-1	6681	6801	UUACUACUCCGGAAAAAAAGAACCAUUUGGAUACAUAGGUAUGGUCUGAGCUAUGAUAUCAAUUGGCUUCCUAGGGUUUAUCGUGUGAGCACACCAUAUAUUUACAGUAGGAAUAGACGUA
hsa-mir-mit-2	8451	8571	AGGAUUGUGGGGGCAAUGAAUGAAGCGAACAGAUUUUCGUUCAUUUUGGUUCUCAGGGUUUGUUAUAAUUUUUUAUUUUUAUGGGCUUUGGUGAGGGAGGUAGGUGGUAGUUUGUGUUUAA
hsa-mir-mit-3	9122	9241	UUACUAUAUGAUAGGCAUGUGAUUGGUGGGUCAUUAUGUGUUGUCGUGCAGGUAGAGGCUUACUAGAAGUGUGAAAACGUAGGCUUGGAUUAAGGCGACAGCGAUUUCUAGGAUAGUCAG
hsa-mir-mit-4	10751	10871	GAUGAUGCUAAUAAUUAGGCUGUGGGUGGUUGUGUUGAUUCAAAUUAUGUGUUUUUUGGAAAGUCAUGUCAGUGGUAGUAAUAUAAUUGUUGGGACGAUUAGUUUUAGCAUUGGAGUAGGU
hsa-mir-mit-5	5032	5152	GGGUCGUGGUGCUGGAGUUUAAGUUGAGUAGUAGGAAUGCGGUAGUAGUUAGGAUAAUAUAAAUAGUUAAAUUAAGAAUGGUUAUGUUAGGGUUGUACGGUAGAACUGCUAUUAUUCAUCC
hsa-mir-mit-6	2402	2522	GCUAGAGGUGAUGUUUUUGGUAAACAGGCGGGGUAAGAUUUGCCGAGUUCCUUUUACUUUUUUUAACCUUUCCUUAUGAGCAUGCCUGUGUUGGGUUGACAGUGAGGGUAAUAAUGACUUG

## Sheet: Table S3
Table S3. List of predicted Human mature-microRNA and their genomic location on mitochondrial genome.
Human miRNA	Start Position	End Position	Mature miRNA Sequence
hsa-miR-mit-1	6715	6735	AUAGGUAUGGUCUGAGCUAUG
hsa-miR-mit-2	8454	8472	GUAGGUGGUAGUUUGUGUU
hsa-miR-mit-3	9186	9207	UAUGUGUUGUCGUGCAGGUAGA
hsa-miR-mit-4	10832	10851	UGUGGGUGGUUGUGUUGAUU
hsa-miR-mit-5	5094	5115	UGCGGUAGUAGUUAGGAUAAUA
hsa-miR-mit-6	2406	2426	UGACAGUGAGGGUAAUAAUGA

## Sheet: Table S4
	Table S4 . miRNA targets for miRanda analysis
NO	Disease	Genes Location	miRNA	Start	End
1	Kearns-Sayre syndrome	Unique deletion
2	Cyclic vomiting syndrome
3	Leber hereditary optic neuropathy (LHON)
	MT-ND1	3307-4262	has-miR-mit4	3395	3422
			has-miR-mit3	3443	3466
			has-miR-mit4	3518	3548
			has-miR-mit3	4061	4081
			has-miR-mit3	4108	4137
	MT-ND4	10760-12137	has-miR-mit2	10787	10813
			has-miR-mit2	10835	10858
			has-miR-mit4	10891	10915
			has-miR-mit4	10987	11009
			has-miR-mit2	11143	11161
			has-miR-mit4	11243	11265
			has-miR-mit4	11481	11501
			has-miR-mit4	11699	11718
			has-miR-mit2	11714	11733
			has-miR-mit4	11750	11775
	MT-ND4L	10470-10766	has-miR-mit4	10523	10544
			has-miR-mit4	10739	10761
	MT-ND6	14149-14673	has-miR-mit5	14197	14224
			has-miR-mit2	14357	14377
			has-miR-mit5	14547	14573
	MT-CO1	5904-7445	has-miR-mit1	5939	5965
			has-miR-mit4	5944	5967
			has-miR-mit1	5988	6011
			has-miR-mit1	6031	6045
			has-miR-mit4	6158	6178
			has-miR-mit1	6200	6222
			has-miR-mit6	6278	6303
			has-miR-mit4	6470	6495
			has-miR-mit4	6522	6545
			has-miR-mit4	6833	6853
			has-miR-mit6	6835	6859
			has-miR-mit4	6867	6889
			has-miR-mit6	6946	6970
			has-miR-mit4	7011	7040
			has-miR-mit4	7217	7238
			has-miR-mit6	7315	7339
			has-miR-mit4	7393	7416
	MT-CO3	9207-9990	has-miR-mit2	9326	9349
			has-miR-mit4	9350	9374
			has-miR-mit4	9395	9419
			has-miR-mit4	9589	9615
			has-miR-mit4	9632	9655
			has-miR-mit2	9803	9828
			has-miR-mit2	9906	9928
	MT-CYB	14747-15887	has-miR-mit5	14892	14922
			has-miR-mit2	14899	14921
			has-miR-mit2	15086	15108
			has-miR-mit5	15180	15204
			has-miR-mit2	15181	15202
			has-miR-mit2	15322	15338
			has-miR-mit5	15713	15737
	MT-ND2	4470-5511	has-miR-mit4	4485	4507
			has-miR-mit3	4500	4528
			has-miR-mit1	5037	5057
			has-miR-mit3	5155	5187
			has-miR-mit4	5310	5331
			has-miR-mit1	5312	5333
			has-miR-mit4	5351	5377
			has-miR-mit1	5377	5395
			has-miR-mit4	5451	5476
			has-miR-mit1	5470	5488
	MT-ND5	12337-14148	has-miR-mit2	12343	12363
			has-miR-mit5	13105	13128
			has-miR-mit2	13302	13329
			has-miR-mit2	13533	13560
			has-miR-mit5	13555	13577
			has-miR-mit5	13622	13652
			has-miR-mit5	13733	13762
			has-miR-mit5	13917	13943
			has-miR-mit5	14000	14027
			has-miR-mit5	14118	14140
	MT-ATP6	8527-9207	has-miR-mit4	8563	8585
			has-miR-mit6	8594	8620
			has-miR-mit4	8694	8718
			has-miR-mit2	8767	8792
			has-miR-mit2	8865	8885
			has-miR-mit6	9075	9101
			has-miR-mit4	9199	9222
4	Leigh syndrome
		8527-9207	has-miR-mit4	8563	8585
	MT-ATP6		has-miR-mit6	8594	8620
			has-miR-mit4	8694	8718
			has-miR-mit2	8767	8792
			has-miR-mit2	8865	8885
			has-miR-mit6	9075	9101
			has-miR-mit4	9199	9222
	MT-ND1	3307-4262	has-miR-mit4	3395	3422
			has-miR-mit3	3443	3466
			has-miR-mit4	3518	3548
			has-miR-mit3	4061	4081
			has-miR-mit3	4108	4137
	MT-ND2	4470-5511	has-miR-mit4	4485	4507
			has-miR-mit3	4500	4528
			has-miR-mit1	5037	5057
			has-miR-mit3	5155	5187
			has-miR-mit4	5310	5331
			has-miR-mit1	5312	5333
			has-miR-mit4	5351	5377
			has-miR-mit1	5377	5395
			has-miR-mit4	5451	5476
			has-miR-mit1	5470	5488
	MT-ND3	10059-10404	has-miR-mit4	10073	10098
			has-miR-mit4	10147	10172
			has-miR-mit4	10298	10320
	MT-ND4	10760-12137	has-miR-mit2	10787	10813
			has-miR-mit2	10835	10858
			has-miR-mit4	10891	10915
			has-miR-mit4	10987	11009
			has-miR-mit2	11143	11161
			has-miR-mit4	11243	11265
			has-miR-mit4	11481	11501
			has-miR-mit4	11699	11718
			has-miR-mit2	11714	11733
			has-miR-mit4	11750	11775
	MT-ND5	12337-14148	has-miR-mit2	12343	12363
			has-miR-mit5	13105	13128
			has-miR-mit2	13302	13329
			has-miR-mit2	13533	13560
			has-miR-mit5	13555	13577
			has-miR-mit5	13622	13652
			has-miR-mit5	13733	13762
			has-miR-mit5	13917	13943
			has-miR-mit5	14000	14027
			has-miR-mit5	14118	14140
	MT-ND6	14149-14673	has-miR-mit5	14197	14224
			has-miR-mit2	14357	14377
			has-miR-mit5	14547	14573
	MT-TK	8295-8364	Not Found
	MT-TV	1602-1670	Not Found
	MT-TW	5512-5579	has-miR-mit1	5524	5545
5	Mitochondrial encephalomyopathy, lactic acidosis, and stroke-like episodes (MELAS Syndrome)
	MT-ND1	3307-4262	has-miR-mit4	3395	3422
			has-miR-mit3	3443	3466
			has-miR-mit4	3518	3548
			has-miR-mit3	4061	4081
			has-miR-mit3	4108	4137
	MT-ND5	12337-14148	has-miR-mit2	12343	12363
			has-miR-mit5	13105	13128
			has-miR-mit2	13302	13329
			has-miR-mit2	13533	13560
			has-miR-mit5	13555	13577
			has-miR-mit5	13622	13652
			has-miR-mit5	13733	13762
			has-miR-mit5	13917	13943
			has-miR-mit5	14000	14027
			has-miR-mit5	14118	14140
	MT-TH	12138-12206	Not Found
	MT-TL1	3230-3304	has-miR-mit3	3237	3260
	MT-TV	1602-1670	Not Found
	MT-CO3	9207-9990	has-miR-mit2	9326	9349
			has-miR-mit4	9350	9374
			has-miR-mit4	9395	9419
			has-miR-mit4	9589	9615
			has-miR-mit4	9632	9655
			has-miR-mit2	9803	9828
			has-miR-mit2	9906	9928
	MT-TK	8295-8364	Not Found
6	Myoclonic epilepsy with ragged-red fibers (MERRF)
	MT-TK	8295-8364	Not Found
	MT-TL1	3230-3304	has-miR-mit3	3237	3260
	MT-TH	12138-12206	Not Found
	MT-TS1	7446-7514	has-miR-mit4	7455	7473
7	Neuropathy, ataxia, and retinitis pigmentosa
	MT-ATP6	8527-9207	has-miR-mit4	8563	8585
			has-miR-mit6	8594	8620
			has-miR-mit4	8694	8718
			has-miR-mit2	8767	8792
			has-miR-mit2	8865	8885
			has-miR-mit6	9075	9101
			has-miR-mit4	9199	9222
8	Nonsyndromic deafness
	MT-RNR1	648-1601	has-miR-mit4	711	731
			has-miR-mit3	756	778
			has-miR-mit4	873	897
			has-miR-mit4	918	940
			has-miR-mit4	1003	1026
			has-miR-mit3	1020	1042
			has-miR-mit4	1139	1161
			has-miR-mit4	1357	1380
			has-miR-mit4	1468	1490
			has-miR-mit3	1587	1611
	MT-TS1	7446-7514	has-miR-mit4	7455	7473
9	Progressive external ophthalmoplegia
	MT-TL1	3230-3304	has-miR-mit3	3237	3260
10	Alzheimer's disease
	MT-RNR2	1671-3229	has-miR-mit4	1708	1732
			has-miR-mit4	2398	2419
			has-miR-mit3	2408	2435
			has-miR-mit4	2530	2551
			has-miR-mit3	2679	2707
			has-miR-mit4	2764	2791
			has-miR-mit3	2924	2946
			has-miR-mit3	3115	3137
11	Diabetes mellitus and deafness
	MT-TL1	3230-3304	has-miR-mit3	3237	3260
12	NARP
	MT-ATP6	8527-9207	has-miR-mit4	8563	8585
			has-miR-mit6	8594	8620
			has-miR-mit4	8694	8718
			has-miR-mit2	8767	8792
			has-miR-mit2	8865	8885
			has-miR-mit6	9075	9101
			has-miR-mit4	9199	9222
13	Cardiomyopathy (MICM)
	MT-TL1	3230-3304	has-miR-mit3	3237	3260
	MT-TL2	12266-12336	Not Found
	MT-TK	8295-8364	Not Found
	MT-TG	9991-10058	Not Found
14	Mitochondrial myopathy
	MT-TL1	3230-3304	has-miR-mit3	3237	3260
	MT-TL2	12266-12336	Not Found
	MT-TP	15956-16023	Not Found
15	Deafness induced by aminoglycosides
	MT-RNR1 (12S ribosomal RNA)	648-1601	has-miR-mit4	711	731
			has-miR-mit3	756	778
			has-miR-mit4	873	897
			has-miR-mit4	918	940
			has-miR-mit4	1003	1026
			has-miR-mit3	1020	1042
			has-miR-mit4	1139	1161
			has-miR-mit4	1357	1380
			has-miR-mit4	1468	1490
			has-miR-mit3	1587	1611
16	Senso-neural deafness
	MT-TS1 (tRNA serine 1)	7446-7514	has-miR-mit4	7455	7473
17	Sideroblastic anemia
	MT-TL2 (tRNA leucine2)	12266-12336	Not Found
18	Symmetric multiple lipomatosis
	MT-TK (tRNA lysine)	8295-8364	Not Found
19	CPEO
	MT-TL1	3230-3304	has-miR-mit3	3237	3260
	MT-TN	5657-5729	has-miR-mit6	5685	5715
20	Exercise intolerance
	MT-CYB	14747-15887	has-miR-mit5	14892	14922
			has-miR-mit2	14899	14921
			has-miR-mit2	15086	15108
			has-miR-mit5	15180	15204
			has-miR-mit2	15181	15202
			has-miR-mit2	15322	15338
			has-miR-mit5	15713	15737
21	LIMM (Lethal infant mitochondrial myopathy)
	MT-TT	15888-15953	Not Found
22	Sudden death
	MT-TL1	3230-3304	has-miR-mit3	3237	3260
23	Bilateral necrosis of striation
	MT-ATP6	8527-9207	has-miR-mit4	8563	8585
			has-miR-mit6	8594	8620
			has-miR-mit4	8694	8718
			has-miR-mit2	8767	8792
			has-miR-mit2	8865	8885
			has-miR-mit6	9075	9101
			has-miR-mit4	9199	9222
24	Multi-systemic
	MT-TL1	3230-3304	has-miR-mit3	3237	3260
25	Corea and dementia
	MT-TW	5512-5579	has-miR-mit1	5524	5545
26	Dystonia
	MT-ND6	14149-14673	has-miR-mit5	14197	14224
			has-miR-mit2	14357	14377
			has-miR-mit5	14547	14573
27	Diabetes and myopathy
	MT-ND6	14149-14673	has-miR-mit5	14197	14224
			has-miR-mit2	14357	14377
			has-miR-mit5	14547	14573
28	Pearson syndrome	Unique deletion

## Sheet: Table S5
	Table S5. miRNA targets for miRanda and RNA22 analysis
NO	Disease	Genes Location	miRNA	Start	End	Softwear
1	Kearns-Sayre syndrome	Unique deletion
2	Cyclic vomiting syndrome
3	Leber hereditary optic neuropathy (LHON)
	MT-ND1	3307-4262	has-miR-mit3	4060	4081	RNA22
			has-miR-mit3	4061	4081	miRanda
	MT-ND4	10760-12137	has-miR-mit4	10987	11009	miRanda
			has-miR-mit2	10994	11012	RNA22
			has-miR-mit5	11231	11252	RNA22
			has-miR-mit4	11243	11265	miRanda
			has-miR-mit4	11750	11775	miRanda
			has-miR-mit4	11755	11774	RNA22
	MT-ND4L	10470-10766	NOT FOUND
	MT-ND6	14149-14673	has-miR-mit4	14344	14363	RNA22
			has-miR-mit2	14357	14377	miRanda
	MT-CO1	5904-7445	has-miR-mit4	5944	5967	miRanda
			has-miR-mit3	5956	5977	RNA22
			has-miR-mit3	6994	7015	RNA22
			has-miR-mit4	7011	7040	miRanda
			has-miR-mit4	7393	7416	miRanda
			has-miR-mit3	7395	7416	RNA22
	MT-CO3	9207-9990	NOT FOUND
	MT-CYB	14747-15887	NOT FOUND
	MT-ND2	4470-5511	has-miR-mit4	5351	5377	miRanda
			has-miR-mit4	5371	5390	RNA22
	MT-ND5	12337-14148	has-miR-mit2	13302	13329	miRanda
			has-miR-mit3	13302	13323	RNA22
			has-miR-mit5	13917	13943	miRanda
			has-miR-mit5	13924	13945	RNA22
	MT-ATP6	8527-9207	has-miR-mit2	8560	8578	RNA22
			has-miR-mit4	8563	8585	miRanda
			has-miR-mit3	9185	9206	RNA22
			has-miR-mit4	9199	9222	miRanda
4	Leigh syndrome
		8527-9207	has-miR-mit2	8560	8578	RNA22
	MT-ATP6		has-miR-mit4	8563	8585	miRanda
			has-miR-mit3	9185	9206	RNA22
			has-miR-mit4	9199	9222	miRanda
	MT-ND1	3307-4262	has-miR-mit3	4060	4081	RNA22
			has-miR-mit3	4061	4081	miRanda
	MT-ND2	4470-5511	has-miR-mit4	5351	5377	miRanda
			has-miR-mit4	5371	5390	RNA22
	MT-ND3	10059-10404	has-miR-mit3	10130	10151	RNA22
			has-miR-mit4	10147	10172	miRanda
	MT-ND4	10760-12137	has-miR-mit4	10987	11009	miRanda
			has-miR-mit2	10994	11012	RNA22
			has-miR-mit5	11231	11252	RNA22
			has-miR-mit4	11243	11265	miRanda
			has-miR-mit4	11750	11775	miRanda
			has-miR-mit4	11755	11774	RNA22
	MT-ND5	12337-14148	has-miR-mit2	13302	13329	miRanda
			has-miR-mit3	13302	13323	RNA22
			has-miR-mit5	13917	13943	miRanda
			has-miR-mit5	13924	13945	RNA22
	MT-ND6	14149-14673	has-miR-mit4	14344	14363	RNA22
			has-miR-mit2	14357	14377	miRanda
	MT-TK	8295-8364	NOT FOUND
	MT-TV	1602-1670	NOT FOUND
	MT-TW	5512-5579	NOT FOUND
5	Mitochondrial encephalomyopathy, lactic acidosis, and stroke-like episodes (MELAS Syndrome)
	MT-ND1	3307-4262	has-miR-mit3	4060	4081	RNA22
			has-miR-mit3	4061	4081	miRanda
	MT-ND5	12337-14148	has-miR-mit2	13302	13329	miRanda
			has-miR-mit3	13302	13323	RNA22
			has-miR-mit5	13917	13943	miRanda
			has-miR-mit5	13924	13945	RNA22
	MT-TH	12138-12206	NOT FOUND
	MT-TL1	3230-3304	NOT FOUND
	MT-TV	1602-1670	NOT FOUND
	MT-CO3	9207-9990	NOT FOUND
	MT-TK	8295-8364	NOT FOUND
6	Myoclonic epilepsy with ragged-red fibers (MERRF)
	MT-TK	8295-8364	NOT FOUND
	MT-TL1	3230-3304	NOT FOUND
	MT-TH	12138-12206	NOT FOUND
	MT-TS1	7446-7514	NOT FOUND
7	Neuropathy, ataxia, and retinitis pigmentosa
	MT-ATP6	8527-9207	has-miR-mit2	8560	8578	RNA22
			has-miR-mit4	8563	8585	miRanda
			has-miR-mit3	9185	9206	RNA22
			has-miR-mit4	9199	9222	miRanda
8	Nonsyndromic deafness
	MT-RNR1	648-1601	NOT FOUND
	MT-TS1	7446-7514	NOT FOUND
9	Progressive external ophthalmoplegia
	MT-TL1	3230-3304	NOT FOUND
10	Alzheimer's disease
	MT-RNR2	1671-3229	has-miR-mit3	2408	2435	miRanda
			has-miR-mit4	2427	2446	RNA22
			has-miR-mit4	2764	2791	miRanda
			has-miR-mit2	2779	2797	RNA22
11	Diabetes mellitus and deafness
	MT-TL1	3230-3304	NOT FOUND
12	NARP
	MT-ATP6	8527-9207	has-miR-mit2	8560	8578	RNA22
			has-miR-mit4	8563	8585	miRanda
			has-miR-mit3	9185	9206	RNA22
			has-miR-mit4	9199	9222	miRanda
13	Cardiomyopathy (MICM)
	MT-TL1	3230-3304	NOT FOUND
	MT-TL2	12266-12336	NOT FOUND
	MT-TK	8295-8364	NOT FOUND
	MT-TG	9991-10058	NOT FOUND
14	Mitochondrial myopathy
	MT-TL1	3230-3304	NOT FOUND
	MT-TL2	12266-12336	NOT FOUND
	MT-TP	15956-16023	NOT FOUND
15	Deafness induced by aminoglycosides
	MT-RNR1 (12S ribosomal RNA)	648-1601	NOT FOUND
16	Senso-neural deafness
	MT-TS1 (tRNA serine 1)	7446-7514	NOT FOUND
17	Sideroblastic anemia
	MT-TL2 (tRNA leucine2)	12266-12336	NOT FOUND
18	Symmetric multiple lipomatosis
	MT-TK (tRNA lysine)	8295-8364	NOT FOUND
19	CPEO
	MT-TL1	3230-3304	NOT FOUND
	MT-TN	5657-5729	NOT FOUND
20	Exercise intolerance
	MT-CYB	14747-15887	NOT FOUND
21	LIMM (Lethal infant mitochondrial myopathy)
	MT-TT	15888-15953	NOT FOUND
22	Sudden death
	MT-TL1	3230-3304	NOT FOUND
23	Bilateral necrosis of striation
	MT-ATP6	8527-9207	has-miR-mit2	8560	8578	RNA22
			has-miR-mit4	8563	8585	miRanda
			has-miR-mit3	9185	9206	RNA22
			has-miR-mit4	9199	9222	miRanda
24	Multi-systemic
	MT-TL1	3230-3304	NOT FOUND
25	Corea and dementia
	MT-TW	5512-5579	NOT FOUND
26	Dystonia
	MT-ND6	14149-14673	has-miR-mit4	14344	14363	RNA22
			has-miR-mit2	14357	14377	miRanda
27	Diabetes and myopathy
	MT-ND6	14149-14673	has-miR-mit4	14344	14363	RNA22
			has-miR-mit2	14357	14377	miRanda
28	Pearson syndrome	Unique deletion	NOT FOUND

## Sheet: Table S6
Table S6. Mitochondrial genes position and Description
Sr. no.	Map Locus	Map Position(np)	Shorthand	Description
1	MT-HV2	57-372	HVS2/HV2	Hypervariable segment 2 [classic:73-340 ]
2	MT-OHR	110-441	OH	H-strand origin
3	MT-CSB1	213-235	CSB1	Conserved sequence block 1
4	MT-TFX	233-260	TFX	mtTF1 binding site
5	MT-TFY	276-303	TFY	mtTF1 binding site
6	MT-CSB2	299-315	CSB2	Conserved sequence block 2
7	MT-HPR	317-321	-	replication primer
8	MT-CSB3	346-363	CSB3	Conserved sequence block 3
9	MT-4H	371-379	mt4H	mt4 H-strand control element
10	MT-3H	384-391	mt3H	mt3 H-strand control element
11	MT-LSP	392-445	PL	L-strand promoter
12	MT-TFL	418-445	-	mtTF1 binding site
13	MT-HV3	438-574	HVS3/HV3	Hypervariable segment 3
14	MT-TFH	523-550	-	mtTF1 binding site
15	MT-HSP1	545-567	PH1	Major H-strand promoter
16	MT-TF	577-647	F	tRNA phenylalanine
17	MT-HSP2	645-645	PH2	Minor H-strand promoter
18	MT-RNR1	648-1601	12S	12S ribosomal RNA
19	MT-TV	1602-1670	V	tRNA valine
20	MT-RNR2	1671-3229	16S	16S ribosomal RNA
21	MT-RNR3	3206-3229	-	5S-like sequence
22	MT-TER	3229-3256	-	Transcription terminator
23	MT-TL1	3230-3304	L(UUA/G)	tRNA leucine 1
24	MT-NC1	3305-3306	NC1	non-coding nucleotides
25	MT-ND1	3307-4262	ND1	NADH Dehydrogenase subunit 1
26	MT-TI	4263-4331	I	tRNA isoleucine
27	MT-TQ	4329-4400	Q	tRNA glutamine
28	MT-NC2	4401-4401	NC2	non-coding nucleotides
29	MT-TM	4402-4469	M	tRNA methionine
30	MT-ND2	4470-5511	ND2	NADH dehydrogenase subunit 2
31	MT-TW	5512-5579	W	tRNA tryptophan
32	MT-NC3	5580-5586	NC3	non-coding nucleotides
33	MT-TA	5587-5655	A	tRNA alanine
34	MT-NC4	5656-5656	NC4	non-coding nucleotides
35	MT-TN	5657-5729	N	tRNA asparagine
36	MT-OLR	5721-5798	OL	L-strand origin
37	MT-TC	5761-5826	C	tRNA cysteine
38	MT-TY	5826-5891	Y	tRNA tyrosine
39	MT-NC5	5892-5903	NC5	non-coding nucleotides
40	MT-CO1	5904-7445	COI	Cytochrome c oxidase subunit I
41	MT-TS1	7446-7514	S(UCN)	tRNA serine 1
42	MT-NC6	7515-7517	NC6	non-coding nucleotides
43	MT-TD	7518-7585	D	tRNA aspartic acid
44	MT-CO2	7586-8269	COII	Cytochrome c oxidase subunit II
45	MT-NC7	8270-8294	NC7	non-coding nucleotides
46	MT-TK	8295-8364	K	tRNA lysine
47	MT-NC8	8365-8365	NC8	non-coding nucleotide
48	MT-ATP8	8366-8572	ATPase8	ATP synthase F0 subunit 8
49	MT-ATP6	8527-9207	ATPase6	ATP synthase F0 subunit 6
50	MT-CO3	9207-9990	COIII	Cytochrome c oxidase subunit III
51	MT-TG	9991-10058	G	tRNA glycine
52	MT-ND3	10059-10404	ND3	NADH dehydrogenase subunit 3
53	MT-TR	10405-10469	R	tRNA arginine
54	MT-ND4L	10470-10766	ND4L	NADH dehydrogenase subunit 4L
55	MT-ND4	10760-12137	ND4	NADH dehydrogenase subunit 4
56	MT-TH	12138-12206	H	tRNA histidine
57	MT-TS2	12207-12265	S(AGY)	tRNA serine2
58	MT-TL2	12266-12336	L(CUN)	tRNA leucine2
59	MT-ND5	12337-14148	ND5	NADH dehydrogenase subunit 5
60	MT-ND6	14149-14673	ND6	NADH dehydrogenase subunit 6
61	MT-TE	14674-14742	E	tRNA glutamic acid
62	MT-NC9	14743-14746	NC9	non-coding nucleotides
63	MT-CYB	14747-15887	Cytb	Cytochrome b
64	MT-TT	15888-15953	T	tRNA threonine
65	MT-ATT	15925-499	ATT	membrane attachment site
66	MT-NC10	15954-15955	NC10	non-coding nucleotides
67	MT-TP	15956-16023	P	tRNA proline
68	MT-DLOOP	16024-576	CR / D-Loop	Control Region, including Displacement loop
69	MT-HV1	16024-16383	HVS1/HV1	Hypervariable segment 1 [classic:16024-16365]
70	MT-7SDNA	16106-191	7S DNA	7S DNA
71	MT-TAS	16157-16172	TAS	termination-associated sequence
72	MT-5	16194-16208	mt5	control element
73	MT-3L	16499-16506	mt3L	L-strand control element
